# Supplementary material for: Optimal Abort Policy for Mission-Critical Systems Under Imperfect Condition Monitoring
Source: Atypon-hosted journal article supplement (doi:10.1287/opre.2022.0643), 2025-05-26
Supplement: opre.2022.0643.cd.zip [file README.pdf › code/README.pdf]

# Data and Codes for “Optimal Abort Policy for Mission-Critical Systems under Imperfect Condition Monitoring”

April 28, 2025

The code used to reproduce the results in the paper is written in MATLAB. For any questions, please contact Jiawen Hu at [hdl@sjtu.edu.cn](mailto:hdl@sjtu.edu.cn).

The folder contains 13 subfolders (indicated in *blue italic*), each of which includes the data, code, and results for a specific experiment.

## *Find optimal lambda*

**Phasetype\_lambda.m** is used to calculate the optimal  $\lambda$  with a given  $m_2$ , and draw Figure 2.

## *C-Policy-Weibull*

**Control\_Chart\_Policy.m** is used to calculate the optimal cost per mission under **C**-policy when  $T_{23}$  follows a Weibull distribution.

## *C-Policy-Weibull-mixture*

**Control\_Chart\_Policy.m** is used to calculate the optimal cost per mission under **C**-policy when  $T_{23}$  follows a mixture distribution.

## *M-Policy-Weibull*

**M\_Policy.m** is used to obtain the optimal probabilities for aborting mission at each decision epoch under **M**-policy when  $T_{23}$  follows a Weibull distribution.

**Simulation\_M\_Policy.m** is used to calculate the optimal cost per mission under **M**-policy when  $T_{23}$  follows a Weibull distribution.

## *M-Policy-Weibull mixture*

**M\_Policy.m** is used to obtain the optimal probabilities for aborting mission at each decision epoch under **M**-policy when  $T_{23}$  follows a mixture distribution.

**Simulation\_M\_Policy.m** is used to calculate the optimal cost per mission under **M**-policy when  $T_{23}$  follows a mixture distribution.

## *One-phase approximation-Weibull*

**One\_Phase\_Approximation.m** is used to obtain the optimal radius for aborting mission at each decision epoch under one-phase approximation policy when  $T_{23}$  follows a Weibull distribution.

**Simulation\_One\_Phase\_Approximation.m** is used to calculate the optimal cost per mission under one-phase approximation policy when  $T_{23}$  follows a Weibull distribution.

## *One-phase approximation-Weibull mixture*

**One\_Phase\_Approximation.m** is used to obtain the optimal radius for aborting mission at each decision epoch under one-phase approximation policy when  $T_{23}$  follows a mixture distribution.

**Simulation\_One\_Phase\_Approximation.m** is used to calculate the optimal cost per mission under one-phase approximation policy when  $T_{23}$  follows a mixture distribution.

#### ***Proposed modified PBVI-Weibull***

**Modified\_PBVI.m** is used to obtain the belief vectors at each decision epoch under proposed model when  $T_{23}$  follows a Weibull distribution.

**Simulation\_Modified\_PBVI.m** is used to calculate the optimal cost per mission under proposed model when  $T_{23}$  follows a Weibull distribution.

#### ***Proposed modified PBVI-Weibull mixture***

**Modified\_PBVI.m** is used to obtain the belief vectors at each decision epoch under proposed model when  $T_{23}$  follows a mixture distribution.

**Simulation\_Modified\_PBVI.m** is used to calculate the optimal cost per mission under proposed model when  $T_{23}$  follows a mixture distribution.

#### ***R-Policy-Weibull***

**RUL\_Policy.m** is used to calculate the optimal cost per mission under **R**-policy when  $T_{23}$  follows a Weibull distribution.

#### ***R-Policy-Weibull mixture***

**RUL\_Policy.m** is used to calculate the optimal cost per mission under **R**-policy when  $T_{23}$  follows a mixture distribution.

#### ***Section 9.3 Table 5***

**Classical\_PBVI.m** is used to calculate the time durations based on the classical PBVI algorithm.

**Modified\_PBVI.m** is used to calculate the time durations based on the modified PBVI algorithm.

#### ***Multi-Task***

**Control\_Chart\_Policy\_MT.m** is used to calculate the optimal cost per mission under **C**-Policy for a multi-task setting.

**RUL\_Policy\_MT.m** is used to calculate the optimal cost per mission under **R**-Policy for a multi-task setting.

**M\_Policy\_MT.m** is used to obtain the optimal probabilities at each decision epoch under **M**-Policy, and **Simulation\_M\_Policy\_MT.m** is used to calculate the optimal cost per mission under **M**-Policy for a multi-task setting.

**One\_Phase\_Approximation\_MT.m** is used to obtain the optimal radius for aborting mission at each decision epoch, and **Simulation\_One\_Phase\_Approximation\_MT.m** is used to calculate the optimal cost per mission under One-phase approximation Policy for a multi-task setting.

**Modified\_PBVI\_MT.m** is used to obtain the belief point vector at each decision epoch under proposed modified\_PBVI Policy, and **Simulation\_Modified\_PBVI\_MT.m** is used to calculate the optimal cost per mission under our proposed modified PBVI for a multi-task setting.
